# Supplementary material for: Molecular identification of Coxiella burnetii in raw milk samples collected from farm animals in districts Kasur and Lahore of Punjab, Pakistan
Source: PubMed Central journal article supplement (PMC11156400; doi:10.1371/journal.pone.0301611), 2024-06-06
Supplement: pone.0301611.s001.pdf [file pone.0301611.s001.pdf]

**Molecular identification of *Coxiella burnetii* in raw milk samples collected from farm animals in districts Kasur and Lahore of Punjab, Pakistan**

**Shahpal Shujat, Wasim Shehzad, Aftab Ahmad Anjum, Julia A. Hertl, Yrjö T. Gröhn, Muhammad Yasir Zahoor**

**SUPPLEMENTARY TABLES**

**Supplementary Table S1** Univariable analysis of *Coxiella burnetii* (Q Fever) prevalence in 11 villages, districts Kasur and Lahore in Punjab province, Pakistan, 2019. P-values determined by Fisher exact tests of association.

| Variable              | Category                  | Q Fever       |                | P value |
|-----------------------|---------------------------|---------------|----------------|---------|
|                       |                           | Pos. / Tested | Prevalence (%) |         |
| <b>District</b>       | Lahore                    | 7/136         | 5.1            | 0.635   |
|                       | Kasur                     | 12/168        | 7.1            |         |
| <b>Village</b>        | Mustafabad, Kasur         | 0/2           | 0.0            | 0.434   |
|                       | Daftu, Kasur              | 0/16          | 0.0            |         |
|                       | Dheng Shah, Kasur         | 0/23          | 0.0            |         |
|                       | Fateh Pur, Kasur          | 2/16          | 12.5           |         |
|                       | Harbanspura, Lahore       | 2/67          | 3.0            |         |
|                       | Korian, Lahore            | 1/23          | 4.3            |         |
|                       | Man, Kasur                | 3/24          | 12.5           |         |
|                       | Mustafabad lalyani, Kasur | 2/28          | 7.1            |         |
|                       | Rohewal, Kasur            | 2/36          | 5.6            |         |
|                       | Soyan, Lahore             | 4/46          | 8.7            |         |
|                       | Wadana, Kasur             | 3/23          | 13.0           |         |
| <b>Ruminant</b>       | Small                     | 6/65          | 9.2            | 0.559   |
|                       | Large                     | 8/138         | 5.8            |         |
|                       | Both                      | 5/101         | 5.0            |         |
| <b>Species</b>        | Cattle                    | 5/90          | 5.6            | 0.337   |
|                       | Buffalo                   | 3/88          | 3.4            |         |
|                       | Goat                      | 4/60          | 6.7            |         |
|                       | Sheep                     | 7/66          | 10.6           |         |
| <b>Breed</b>          | Exotic                    | 2/16          | 12.5           | 0.263   |
|                       | Indigenous                | 17/288        | 5.9            |         |
| <b>Farming System</b> | Commercial                | 5/123         | 4.1            | 0.233   |
|                       | Household                 | 14/181        | 7.7            |         |

|                            |                         |        |      |       |
|----------------------------|-------------------------|--------|------|-------|
| <b>Feed pattern</b>        | Stallfed                | 9/159  | 5.7  | 0.547 |
|                            | Grazing                 | 9/108  | 8.3  |       |
|                            | Both                    | 1/34   | 2.9  |       |
| <b>Milking Method</b>      | Hand                    | 19/282 | 6.7  | 0.378 |
|                            | Machine and Hand        | 0/22   | 0.0  |       |
| <b>Breeding Method</b>     | Artificial insemination | 0/11   | 0.0  | 0.482 |
|                            | Other                   | 6/68   | 8.8  |       |
|                            | Both                    | 13/225 | 5.8  |       |
| <b>Farm Disinfection</b>   | Yes                     | 18/248 | 7.3  | 0.485 |
|                            | No                      | 1/38   | 2.6  |       |
| <b>Deworming Performed</b> | Yes                     | 19/300 | 6.3  | 1.000 |
|                            | No                      | 0/4    | 0.0  |       |
| <b>Mastitis</b>            | Yes                     | 1/37   | 2.7  | 0.487 |
|                            | No                      | 18/267 | 6.7  |       |
| <b>Abortion</b>            | Yes                     | 1/5    | 20.0 | 0.277 |
|                            | No                      | 18/299 | 6.0  |       |
| <b>Body Condition</b>      | Good                    | 0/5    | 0.0  | 1.000 |
|                            | Average                 | 19/297 | 6.4  |       |
|                            | Weak                    | 0/2    | 0.0  |       |

**Supplementary Table S2** Controlling species variable for univariate analyses for *Coxiella burnetii* prevalence in districts Kasur and Lahore in Punjab province, Pakistan, 2019. P-values determined by Fisher exact tests of association.

| <b>Breed</b>      | <b>Cattle</b> | <b>Buffalo</b> | <b>Goat</b>  | <b>Sheep</b> |
|-------------------|---------------|----------------|--------------|--------------|
| <b>Exotic</b>     |               |                |              |              |
| Infected          | 12.5% (2/16)  | 0% (0/0)       | 0% (0/0)     | 0% (0/0)     |
| Non Infected      | 87.5%(14/16)  | 0% (0/0)       | 0% (0/0)     | 0% (0/0)     |
| <b>Indigenous</b> |               |                |              |              |
| Infected          | 4.1% (3/74)   | 3.4% (3/88)    | 6.7% (4/60)  | 10.6% (7/66) |
| Non Infected      | 95.9%(71/74)  | 83.5%(71/85)   | 93.3%(56/60) | 89.4%(59/66) |
| <b>P value</b>    | 0.22          | -              | -            | -            |

**Supplementary Table S3** Controlling body condition variable for univariate analyses for *Coxiella burnetii* prevalence in districts Kasur and Lahore in Punjab province, Pakistan, 2019. P-values determined by Fisher exact tests of association.

| Body Condition | Infection | Cattle Frequency |      | Buffalo Frequency |      | Goat Frequency |     | Sheep Frequency |     | Overall Frequency |      |
|----------------|-----------|------------------|------|-------------------|------|----------------|-----|-----------------|-----|-------------------|------|
| Weak           | Positive  | 0                | 0%   | 0                 | 0%   | 0              | 0   | 0               | 0   | 0                 | 0%   |
|                | Negative  | 1                | 100% | 1                 | 100% | 0              | 0   | 0               | 0   | 2                 | 100% |
|                | Total     | 1                |      | 1                 |      | 0              |     | 0               |     | 2                 |      |
| Average        | Positive  | 5                | 7%   | 3                 | 4%   | 4              | 7%  | 7               | 11% | 19                | 6%   |
|                | Negative  | 81               | 93%  | 82                | 96%  | 56             | 93% | 59              | 89% | 278               | 94%  |
|                | Total     | 86               |      | 85                |      | 60             |     | 66              |     | 297               | 297  |
| Good           | Positive  | 0                | 0%   | 0                 | 0%   | 0              | 0   | 0               | 0   | 0                 | 0%   |
|                | Negative  | 3                | 100% | 2                 | 100% | 0              | 0   | 0               | 0   | 5                 | 100% |
|                | Total     | 3                |      | 2                 |      | 0              |     | 0               |     | 5                 |      |
| P value        |           | 1.00             |      | 1.00              |      | -              |     | -               |     | 1.00              |      |

**Supplementary Table S4** Controlling mastitis variable for univariate analyses for *Coxiella burnetii* prevalence in districts Kasur and Lahore in Punjab province, Pakistan, 2019. P-values determined by Fisher exact tests of association.

| Mastitis | Infection | Cattle Frequency |      | Buffalo Frequency |     | Goat Frequency |      | Sheep Frequency |     | Overall Frequency |     |
|----------|-----------|------------------|------|-------------------|-----|----------------|------|-----------------|-----|-------------------|-----|
| Yes      | Positive  | 0                | 0%   | 1                 | 7%  | 0              | 0%   | 0               | 0   | 1                 | 3%  |
|          | Negative  | 14               | 100% | 14                | 93% | 8              | 100% | 0               | 0   | 36                | 97% |
|          | Total     | 14               |      | 15                |     | 8              |      | 0               |     | 37                |     |
| No       | Positive  | 5                | 7%   | 2                 | 3%  | 4              | 8%   | 7               | 12% | 18                | 7%  |
|          | Negative  | 71               | 93%  | 71                | 97% | 48             | 92%  | 59              | 88% | 249               | 93% |
|          | Total     | 76               |      | 73                |     | 52             |      | 66              |     | 267               |     |
| P value  |           | 1.00             |      | 0.43              |     | 1.00           |      | -               |     | 0.49              |     |
